# Supplementary material
Source: PubMed Central journal article supplement (PMC4225176)
Supplement: NIHMS630514-supplement-1.pdf [file NIHMS630514-supplement-1.pdf]

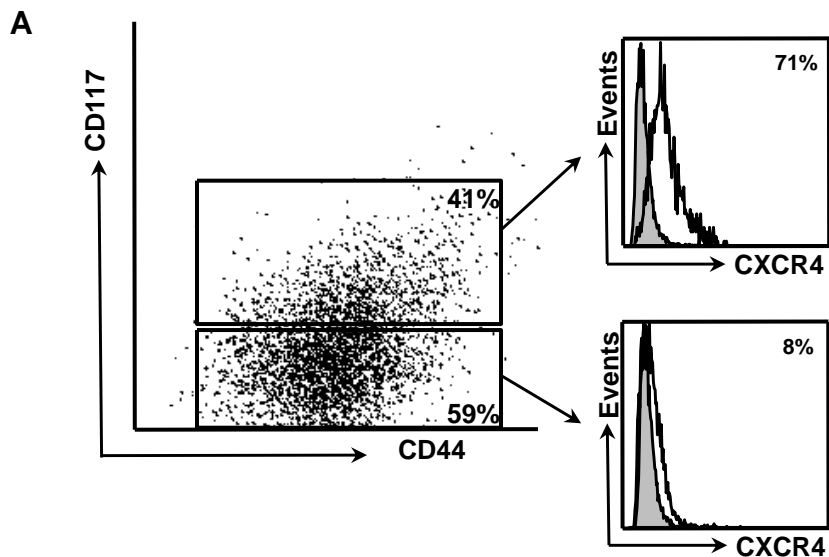

**Supplemental Figure 1. Expression of CXCR4 on ID8-T spheroids.** Tumor cells were plated in ultra-low attachment 24-well plates and grown in serum-free Dulbecco's Modified Eagle's Medium/F12 supplemented with 5  $\mu\text{g/ml}$  insulin, 0.4% bovine serum albumin, 10 ng/ml basic fibroblast growth factor, and 20 ng/ml recombinant EGF. Sphere formation was assessed 12-14 days after seeding. Spheres were collected by gentle centrifugation, dissociated enzymatically, and analyzed for cell surface expression of CXCR4, CD117, and CD44 by staining with rat anti-mouse CXCR4-PE, CD44-PerCP-Cy5.5, and CD117-APC mAbs followed by flow cytometry. Results are from one representative experiment of three performed.

**A**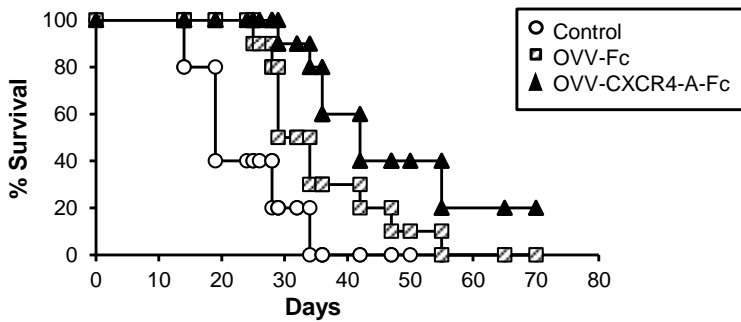**B**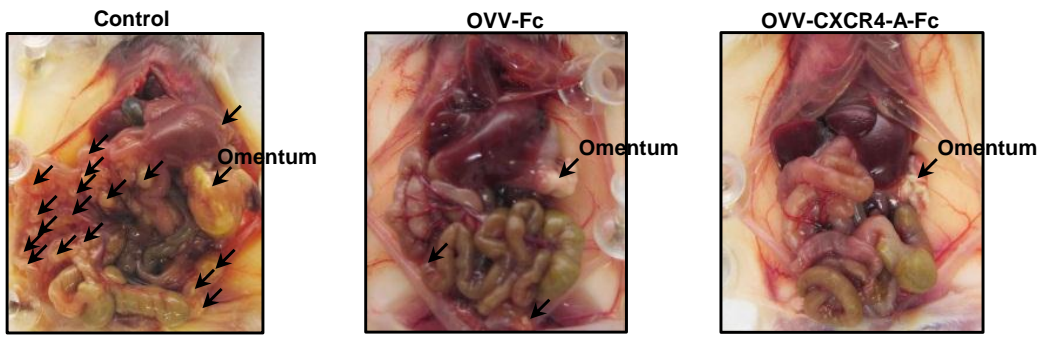

**Supplemental Figure 2. The effect of the oncolytic virotherapy on survival and metastatic dissemination of CAOV2 ovarian tumor in SCID mice.** (A) SCID mice ( $n = 8-10/\text{group}$ ) were injected i.p. with  $5 \times 10^6$  CaOV2 cells. Seven days later, the tumor-bearing mice were treated with PBS (control), OVV-Fc or OVV-CXCR4-A-Fc ( $2.5 \times 10^7$  PFU). Survival was defined as the point at which mice were killed because of extensive tumor burden (i.e., experimental/humane endpoints). Kaplan-Meier survival plots were prepared and significance between OVV-CXCR4-A-Fc and OVV-Fc-treated tumors ( $P = 0.03$ ) was determined using the log-rank method. (B) Representative images of metastatic dissemination of CAOV2 tumor in the omentum, diaphragm, mesentery and peritoneal wall in control, OVV-Fc- and OVV-CXCR4-A-Fc-treated mice are shown.
